# Supplementary material for: Dithiazolyl-benzothiadiazole-containing polymer acceptors: synthesis, characterization, and all-polymer solar cells
Source: Royal Society of Chemistry journal article supplement (doi:10.1039/c3py00112a), 2013-01-01
Supplement: c3py00112a.pdf [file c3py00112a.pdf]

**Supporting Information**  
**For**  
**Dithiazolyl-benzothiadiazole-containing**  
**polymer acceptor: Synthesis, characterization,**  
**and all-polymer solar cells**

*Yue Cao, Ting lei, Jingsong Yuan, Jie-Yu Wang\* and Jian Pei\**

*Beijing National Laboratory for Molecular Sciences, the Key Laboratory of  
Bioorganic Chemistry and Molecular Engineering of Ministry of Education, College  
of Chemistry and Molecular Engineering, Peking University, Beijing, China  
E-mail: jianpei@pku.edu.cn; wang-jieyu@163.com*

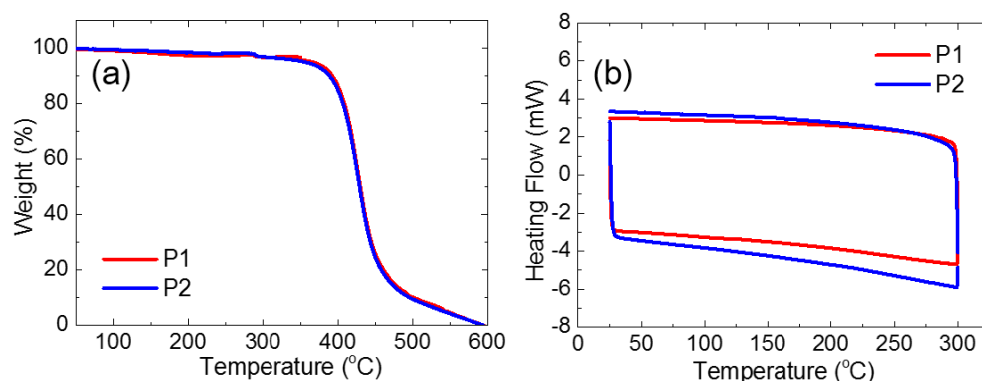

**Figure S1.** (a) Thermal gravity analyses (TGA) of **P1** (5% loss, 366 °C) and **P2** (5% loss, 355 °C). (b) Differential scanning calorimetry (DSC) traces of **P1** and **P2** (scan rate: 10 °C/min). No phase transition was observed.

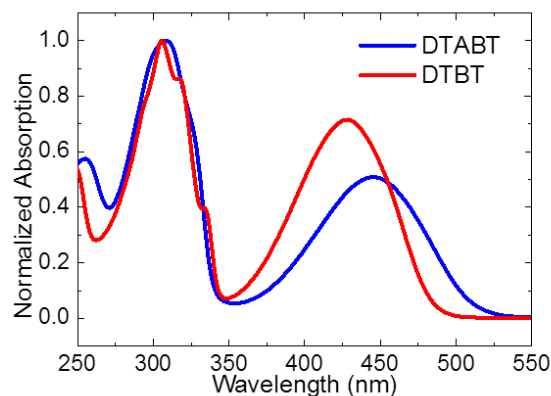

**Figure S2.** Normalized absorption spectra of **DTABT** and **DTBT** in  $\text{CHCl}_3$  ( $1 \times 10^{-5}$  M). Absorption bands from 350 to 550 nm are attributed to the intramolecular charge transfer from thiazole or thiophene to BT. Similar absorption features were observed in band II absorption of **P1** and **P2**. The peaks around 306 nm are the absorption of BT moieties. Three obvious vibrational peaks around 306 nm indicated that **DTABT** has a rigid  $\pi$  system.

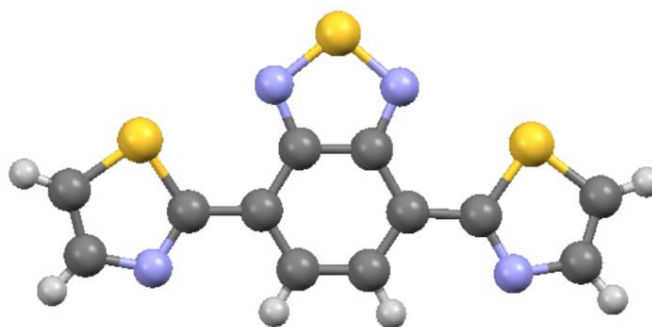

**Figure S3.** Single crystal packing diagrams of compounds **DTABT**.<sup>1</sup> Only one conformation in **DTABT** single crystal was observed and no disorder caused by the thiazole ring rotation. The S atoms of the thiazole units are shortly contacted with the N atom of the thiazole with a distance of 2.9 Å. Dihedron angle between BT and thiazole is 6°, indicating **DTABT** has an almost planar structure.

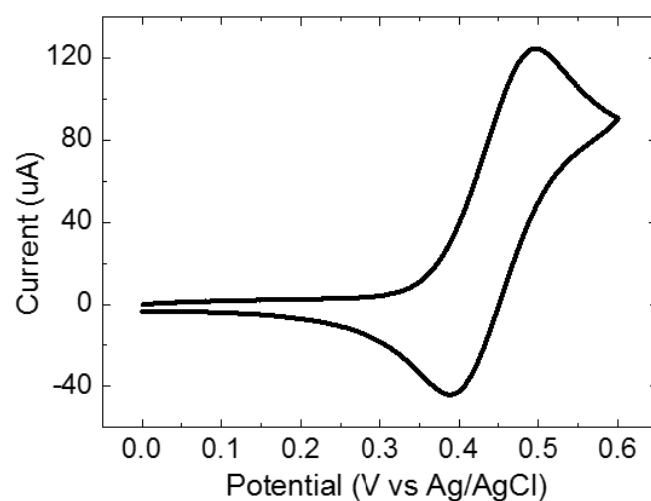

**Figure S4.** Cyclic voltammogram of ferrocene in solution. Measurements were carried out in acetonitrile containing 0.1 M *n*-Bu<sub>4</sub>NPF<sub>6</sub> as supporting electrolyte.

**Reference:**

- 1 M. Akhtaruzzaman, N. Kamata, J. Nishida, S. Ando, H. Tada, M. Tomura and Y. Yamashita, *Chem. Commun.*, **2005**, 3183-3185.
